# Supplementary material
Source: Springer Nature journal article supplement (https://www.springermedizin.de/resource/supplementary/40478_2014_108_MOESM3_ESM.pdf/25658178)

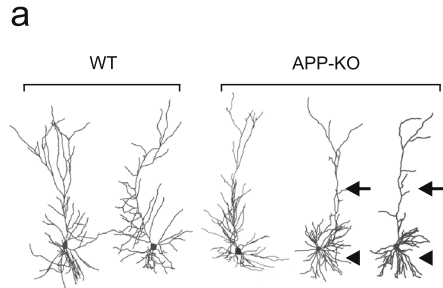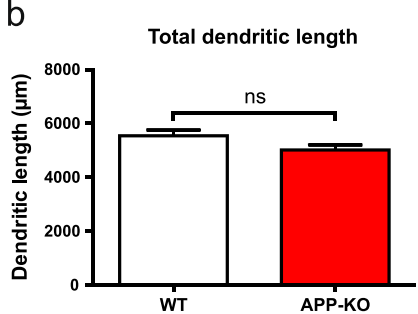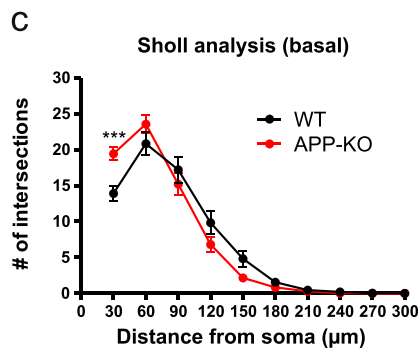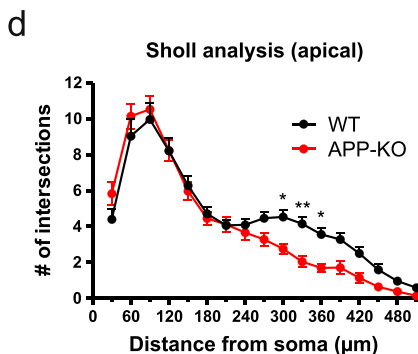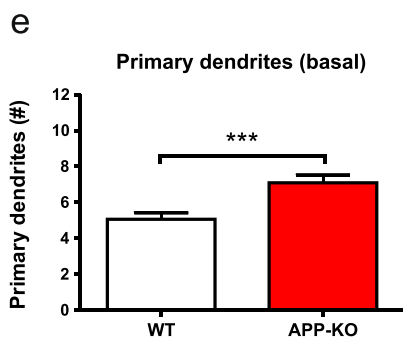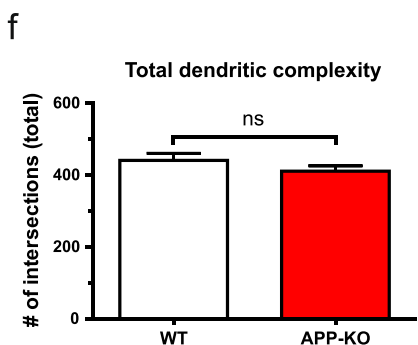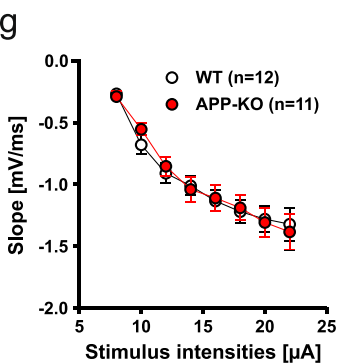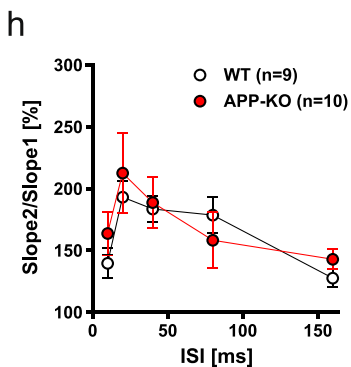

Supplement: MOESM3 [file 25658178]
